# Supplementary material for: 43-Year Temporal Trends in Immune Response to Oral Bacteria in a Swedish Population
Source: PubMed Central journal article supplement (PMC7400255; doi:10.3390/pathogens9070544), 2020-07-07
Supplement: pathogens-09-00544-s001.pdf [file pathogens-09-00544-s001.pdf]

**Supplementary Table 1. Bacterial strains used in checker board assay.** Bacterial strains were cultivated for 48-72 hours on blood, chocolate blood, or Rogosa agar plates under aerobic (5% CO<sub>2</sub>) or anaerobic conditions at 37°C as indicated below. Bacterial cells were harvested using cotton swabs, re-suspended, washed twice in 50 mM Tris-HCl (pH 7.5) containing 150 mM NaCl (TBS), and adjusted to an optical density of 1.0 at 600 nm before storing at -80°C in aliquots.

| Number | Species                                                                                               | Isolate/name           | Agar plate | Condition |
|--------|-------------------------------------------------------------------------------------------------------|------------------------|------------|-----------|
| 1      | <i>Actinomyces johnsonii</i>                                                                          | PK1259                 | chocolate  | aerobic   |
| 2      | <i>Actinomyces naeslundii</i>                                                                         | PK606                  | chocolate  | aerobic   |
| 3      | <i>Actinomyces odontolyticus</i>                                                                      | PK984                  | chocolate  | aerobic   |
| 4      | <i>Actinomyces viscosus</i>                                                                           | Ly7                    | chocolate  | aerobic   |
| 5      | <i>Aggregatibacter actinomycetemcomitans</i>                                                          | D7ss (serotype a)      | blood      | aerobic   |
| 6      | <i>Aggregatibacter actinomycetemcomitans</i>                                                          | Y4 (serotype b)        | blood      | aerobic   |
| 7      | <i>Aggregatibacter actinomycetemcomitans</i>                                                          | NCTC 9710 (serotype c) | blood      | aerobic   |
| 8      | <i>Aggregatibacter actinomycetemcomitans</i>                                                          | POOL 1                 | blood      | aerobic   |
| 9      | <i>Bifidobacterium denticum</i>                                                                       | CCUG 18367 T           | chocolate  | anaerobic |
| 10     | <i>Bifidobacterium longum</i>                                                                         | CCUG 15137             | chocolate  | anaerobic |
| 11     | <i>Corynebacterium durum</i>                                                                          | CCUG 60194             | chocolate  | aerobic   |
| 12     | <i>Corynebacterium durum</i>                                                                          | CCUG 43120             | chocolate  | aerobic   |
| 13     | <i>Corynebacterium matruchotii</i>                                                                    | CCUG 46620 T           | blood      | anaerobic |
| 14     | <i>Corynebacterium matruchotii</i>                                                                    | CCUG 47160             | blood      | anaerobic |
| 15     | <i>Filifactor alocis</i>                                                                              | POOL 2                 | blood      | anaerobic |
| 16     | <i>Haemophilus parainfluenzae</i>                                                                     | CCUG 12836 T           | chocolate  | anaerobic |
| 17     | <i>Lactobacillus brevis</i>                                                                           | CCUG 30670             | rogosa     | anaerobic |
| 18     | <i>Lactobacillus colehominis</i>                                                                      | CCUG 44007             | rogosa     | anaerobic |
| 19     | <i>Lactobacillus jensenii</i>                                                                         | CCUG 35572             | rogosa     | anaerobic |
| 20     | <i>Lactobacillus reuteri</i>                                                                          | CCUG 33624             | rogosa     | anaerobic |
| 21     | <i>Lactobacillus salivarius</i>                                                                       | CCUG 31453             | rogosa     | anaerobic |
| 22     | <i>Porphyromonas gingivalis</i>                                                                       | W381                   | chocolate  | anaerobic |
| 23     | <i>Porphyromonas gingivalis</i>                                                                       | CCUG 33277             | chocolate  | anaerobic |
| 24     | <i>Porphyromonas gingivalis</i>                                                                       | W50                    | chocolate  | anaerobic |
| 25     | <i>Streptococcus cristatus</i>                                                                        | CCUG 43159             | chocolate  | aerobic   |
| 26     | <i>Streptococcus gordonii</i>                                                                         | POOL 3                 | blood      | aerobic   |
| 27     | <i>Streptococcus intermedius</i>                                                                      | ATCC 27335             | chocolate  | aerobic   |
| 28     | <i>Streptococcus mitis</i>                                                                            | POOL 4                 | blood      | aerobic   |
| 29     | <i>Streptococcus mutans</i>                                                                           | POOL 5                 | blood      | aerobic   |
| 30     | <i>Streptococcus mutans</i>                                                                           | CCUG 11877 T           | blood      | aerobic   |
| 31     | <i>Streptococcus oralis</i>                                                                           | POOL 6                 | blood      | aerobic   |
| 32     | <i>Streptococcus salivarius</i>                                                                       | ATCC 7073              | blood      | aerobic   |
| 33     | <i>Streptococcus sanguinis</i>                                                                        | POOL 7                 | blood      | aerobic   |
| 34     | <i>Streptococcus sobrinus</i>                                                                         | OMZ176                 | blood      | aerobic   |
| POOL 1 | 389U (serotype a), IDH1705 (serotype d), 173 Gh (serotype e), C1000 (serotype f), SEA275 (serotype f) |                        |            |           |
| POOL 2 | CCUG 47790 and 148B-17 (clinical isolate)                                                             |                        |            |           |
| POOL 3 | SK120, Blackburn, M5, SK12, DL 1, SK184                                                               |                        |            |           |
| POOL 4 | SK34, SK113                                                                                           |                        |            |           |
| POOL 5 | UA159, NG8, LT11, Ingbritt, JBP                                                                       |                        |            |           |
| POOL 6 | LA11, LVG1, SK143, SK2, ATCC10554                                                                     |                        |            |           |
| POOL 7 | ATCC 10556, SK112                                                                                     |                        |            |           |
